# Supplementary figures and images for: Eugenia uniflora leaves essential oil induces toxicity in Drosophila melanogaster: involvement of oxidative stress mechanisms
Source: Royal Society of Chemistry journal article supplement (doi:10.1039/c4tx00162a), 2014-12-15

## Supplementary figure 1.

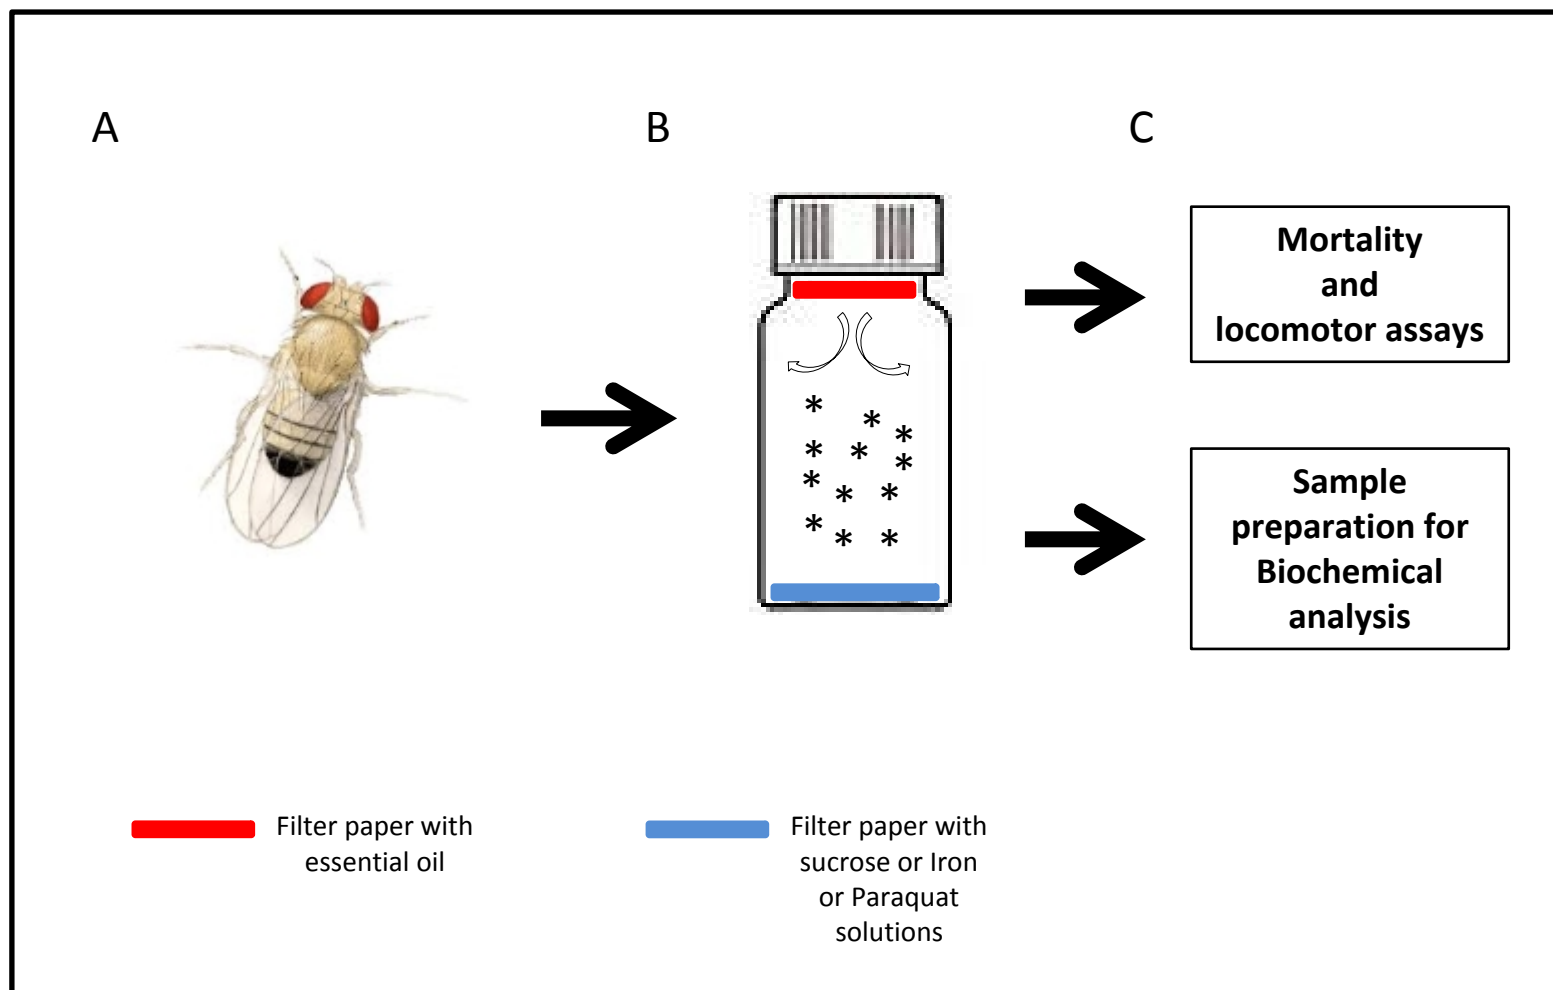

Supplement: c4tx00162a1.pdf [file c4tx00162a1.pdf]
